# Supplementary material for: TFEB controls integrin-mediated endothelial cell adhesion by the regulation of cholesterol metabolism
Source: PubMed Central journal article supplement (PMC9519734; doi:10.1007/s10456-022-09840-x), 2022-05-11

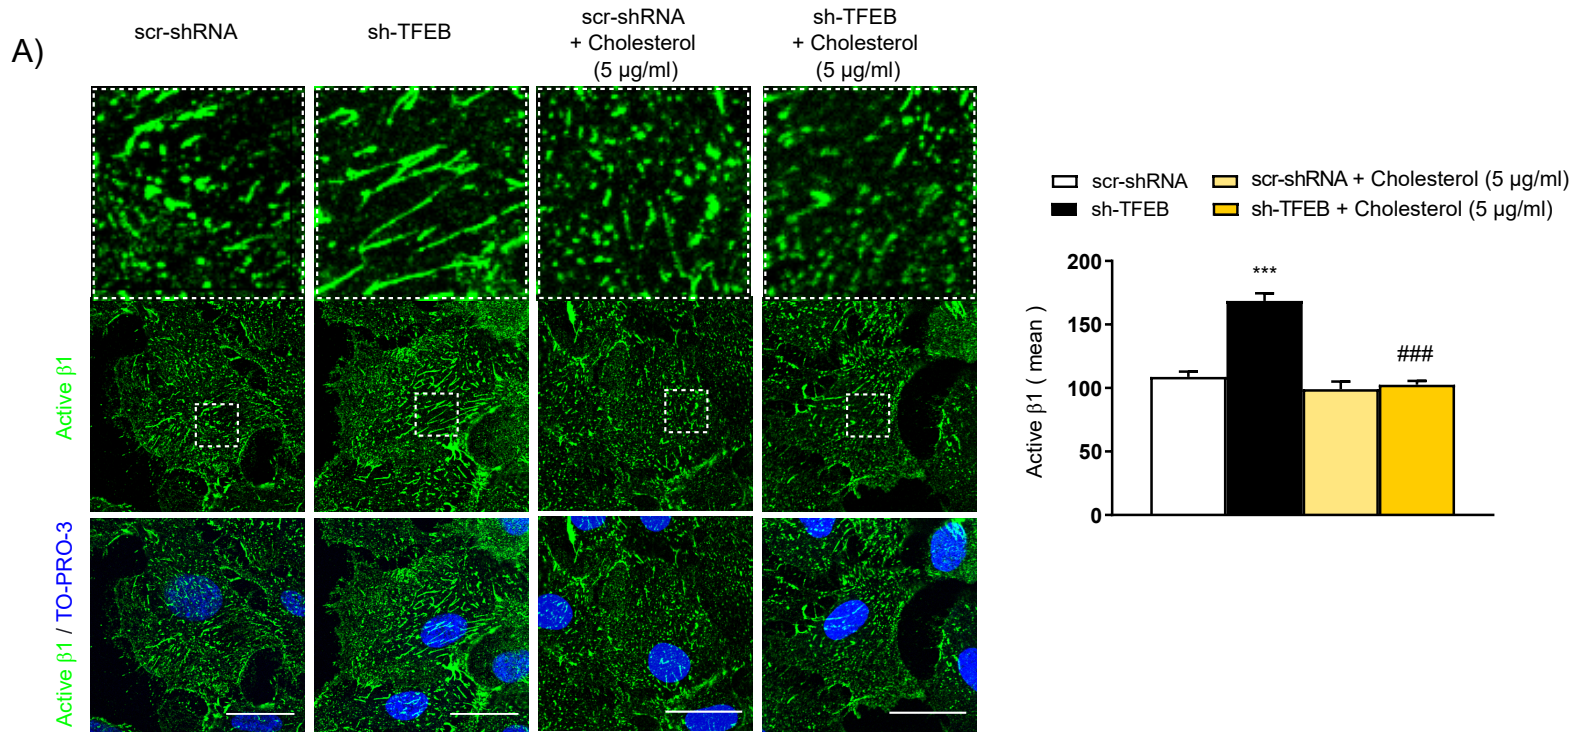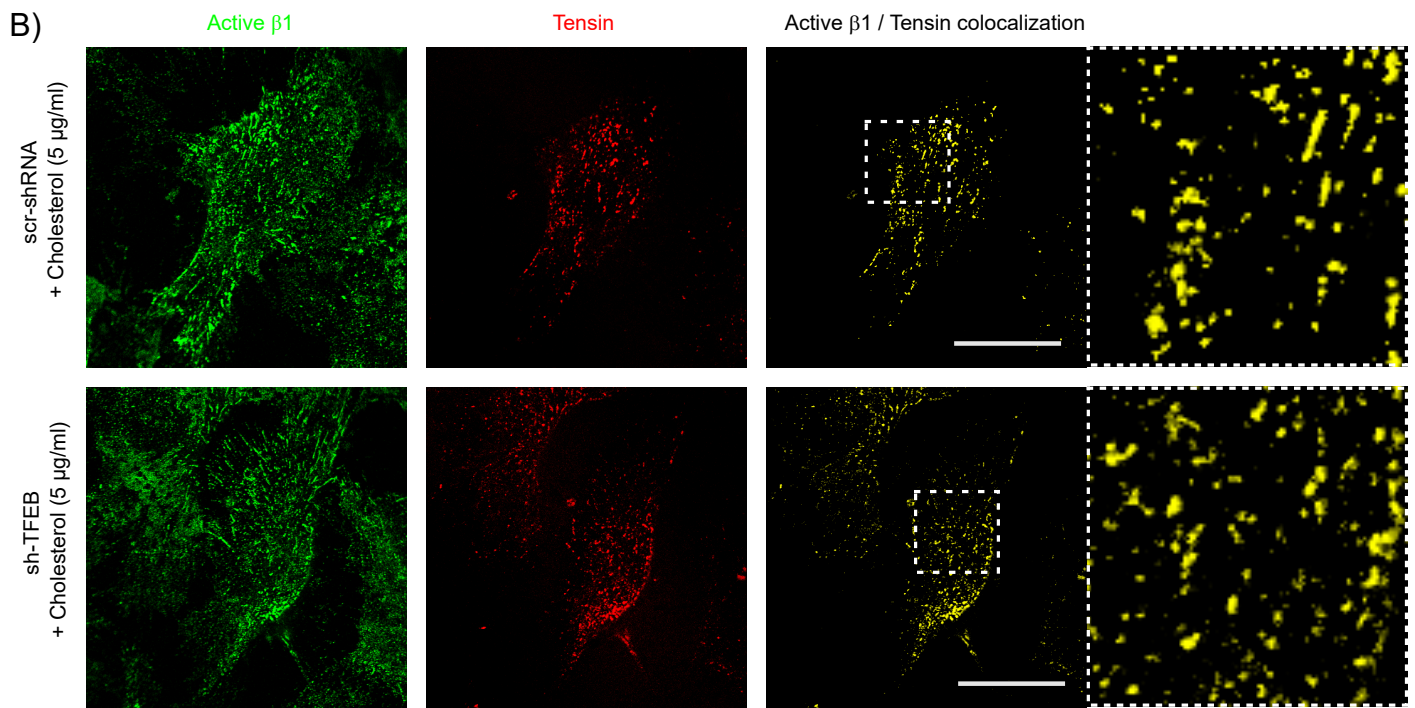

Supplement: 10456_2022_9840_MOESM5_ESM.pdf [file 10456_2022_9840_MOESM5_ESM.pdf]
